# Supplementary material for: CLING: Candidate Cancer-Related lncRNA Prioritization via Integrating Multiple Biological Networks
Source: PubMed Central journal article supplement (PMC7077056; doi:10.3389/fbioe.2020.00138), 2020-03-10
Supplement: Data_Sheet_1.pdf [file Data_Sheet_1.pdf]

# **CLING: Candidate cancer-related lncRNA prioritization via integrating multiple biological networks**

## **Supplementary Data**

**Supplemental Figures S1-S9.** Topological properties of nine lncRNA-centric networks involved in BLCA (Figure S1), BRCA (Figure S2), HNSC (Figure S3), LIHC (Figure S4), LUAD (Figure S5), LUSC (Figure S6), OV (Figure S7), PRAD (Figure S8), and STAD (Figure S9). **(A)** Nine networks used to prioritize potential cancer-related lncRNAs. **(B, C)** Known cancer lncRNAs generally showed significant higher degree and betweenness centrality than other candidates in most networks (\*, \*\*, \*\*\* signifying  $P < 0.05$ ,  $P < 0.01$ ,  $P < 0.001$ , respectively). Data are presented as means  $\pm$ SEM. Known cancer lncRNAs and candidates are indicated in red and blue along the X axis. Average degrees of these two groups of lncRNAs are specified along the Y axis. **(D)** All networks displayed a power law distribution except LFS (lncRNA function similarity network). X axis indicates lncRNA degree distribution, Y axis indicates the number of lncRNAs according to the X axis.

**Supplemental Figure S10.** The expression level of lncRNA NR2F1-AS1 in diverse cancer types. The red and green points represent expression of NR2F1-AS1 in tumor and normal samples. Red and green names of cancers represent up- and down-regulation.

**Supplementary Table S1. Number of nodes (lncRNAs) and edges involved in the nine networks across 10 cancers.**

**Supplementary Table S2. Summary of literature-verified lncRNAs.**

**Supplementary Table S3. Time requirements of all three data integration methods.**

**Supplementary Table S4. CLING-ranked list of the top 20 candidate LIHC-related lncRNAs**

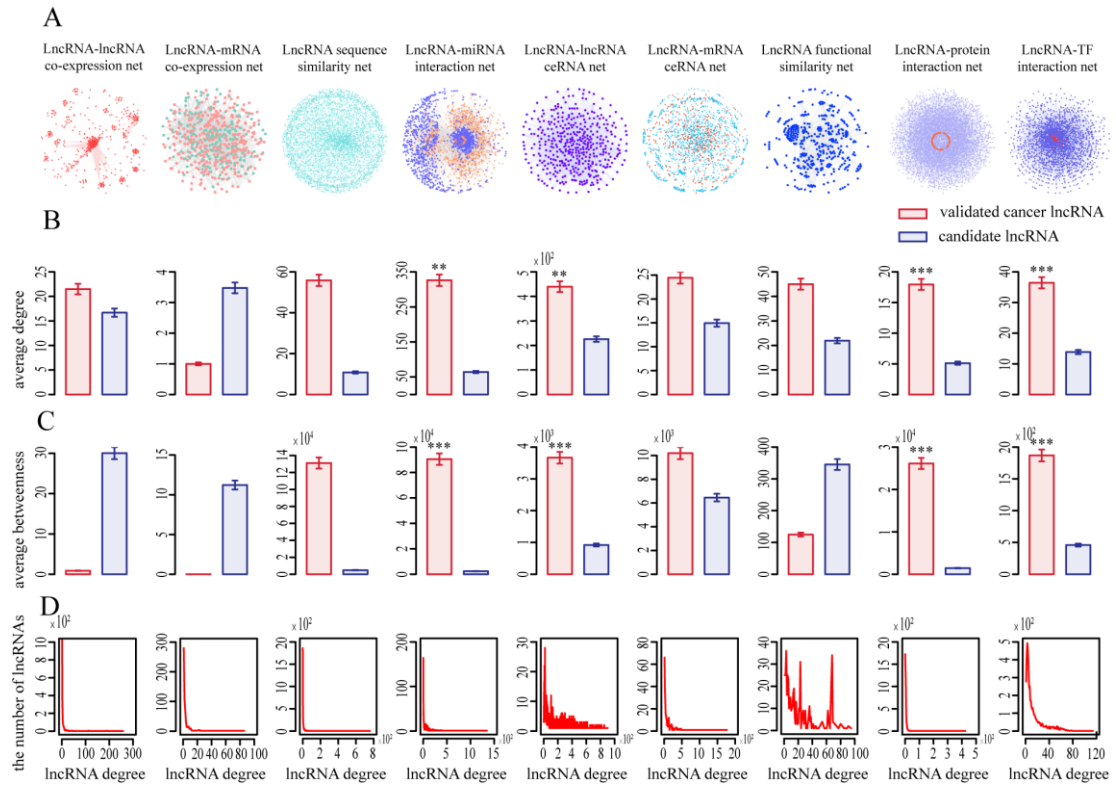

**Supplementary Figure S1**

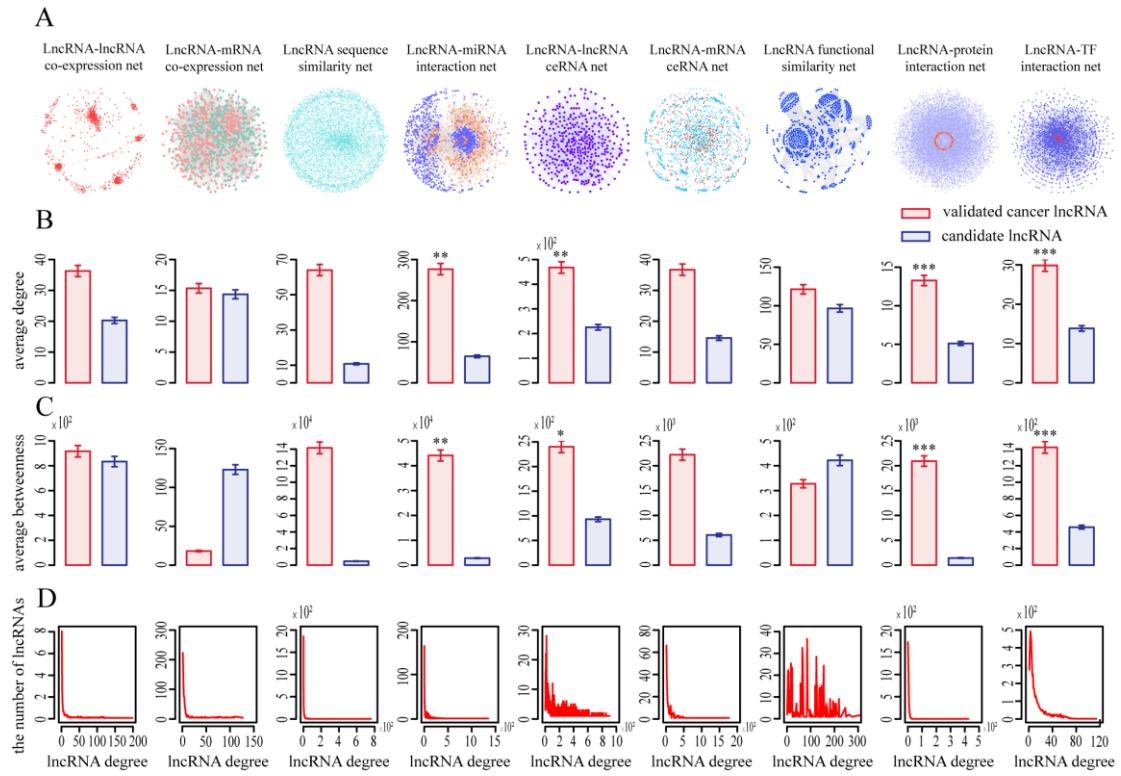

**Supplementary Figure S2**

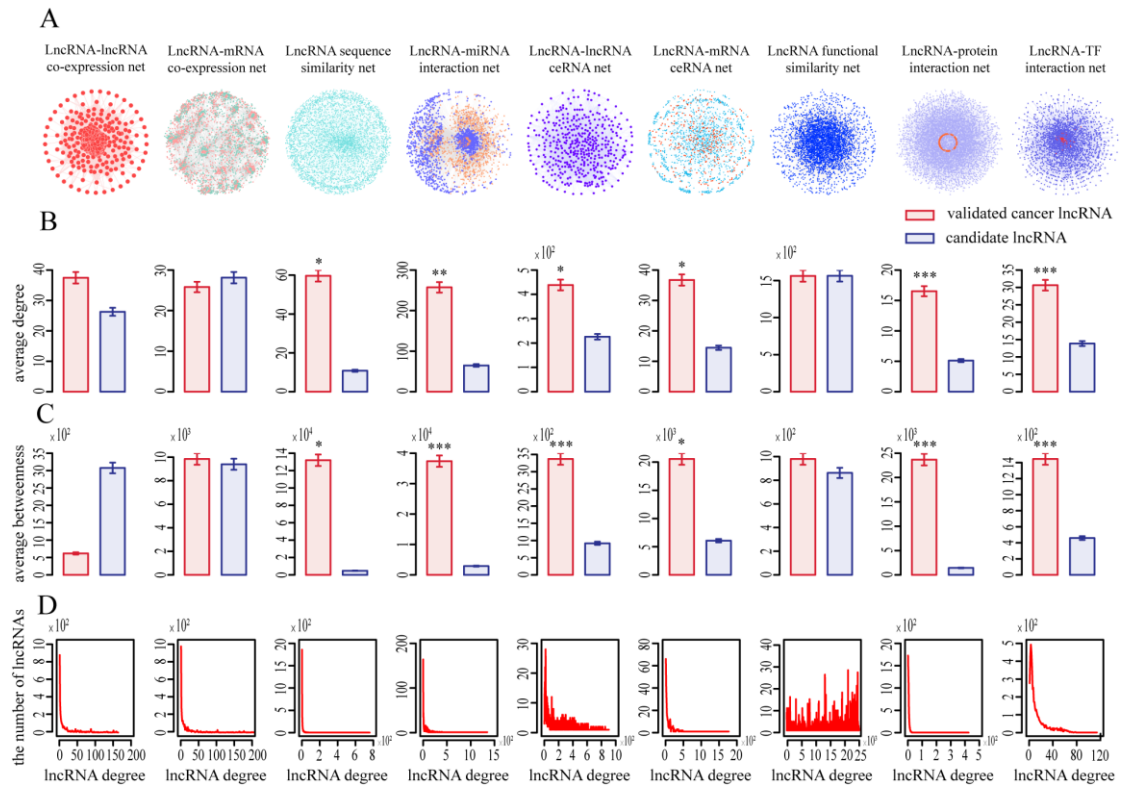

**Supplementary Figure 3**

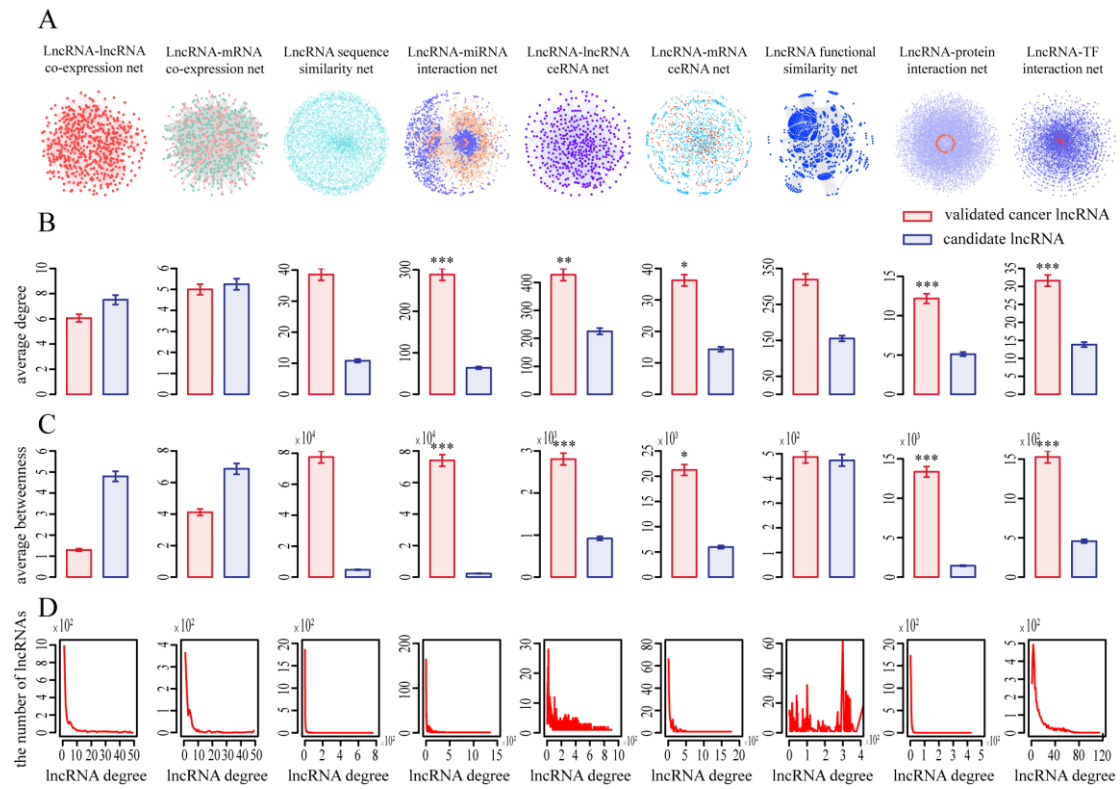

**Supplementary Figure S4**

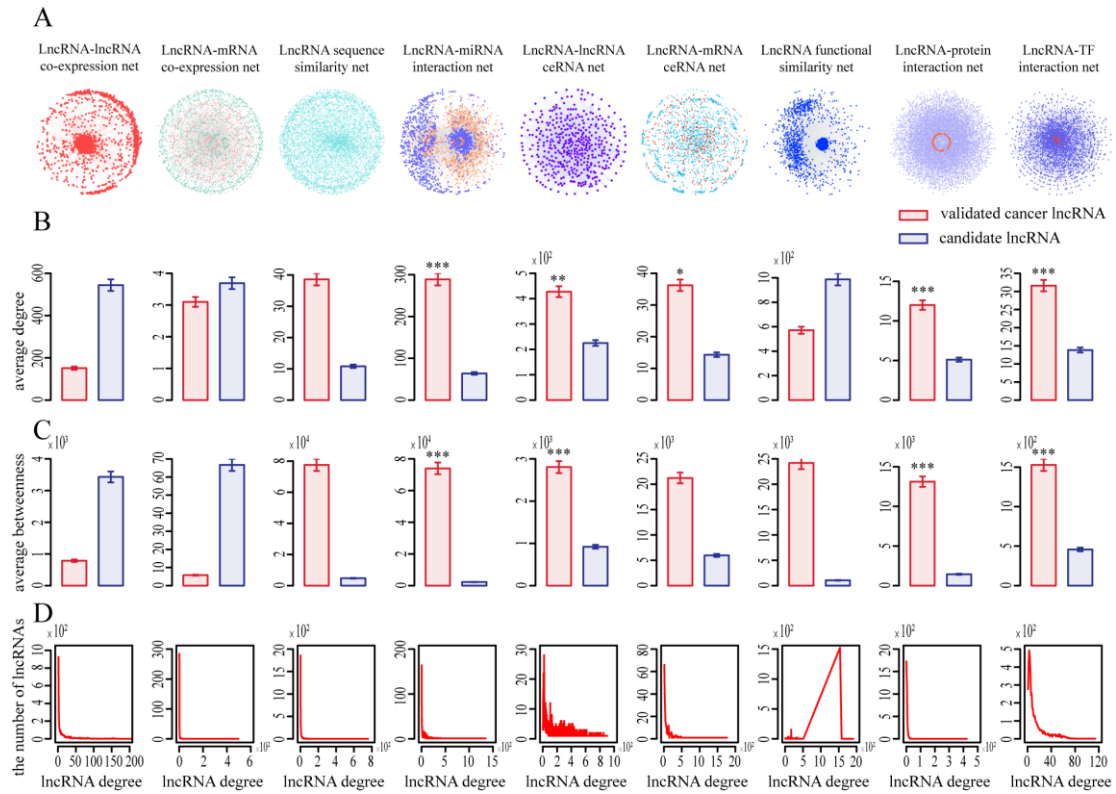

**Supplementary Figure S5**

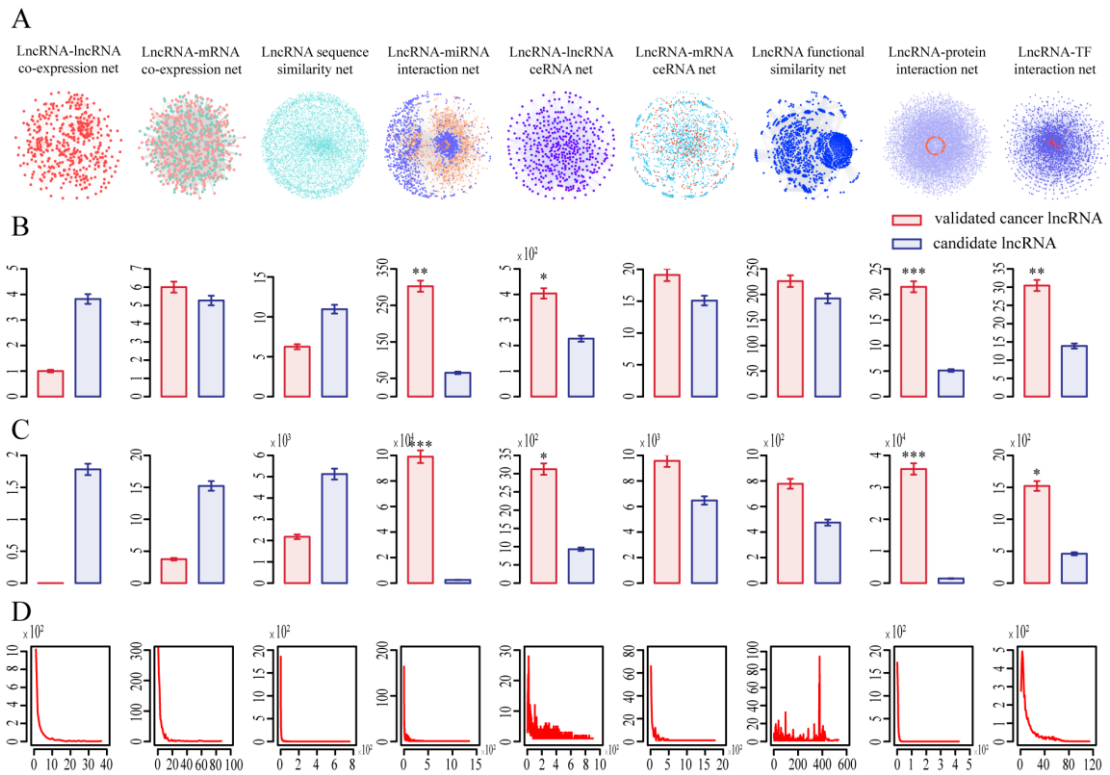

Supplementary Figure S6

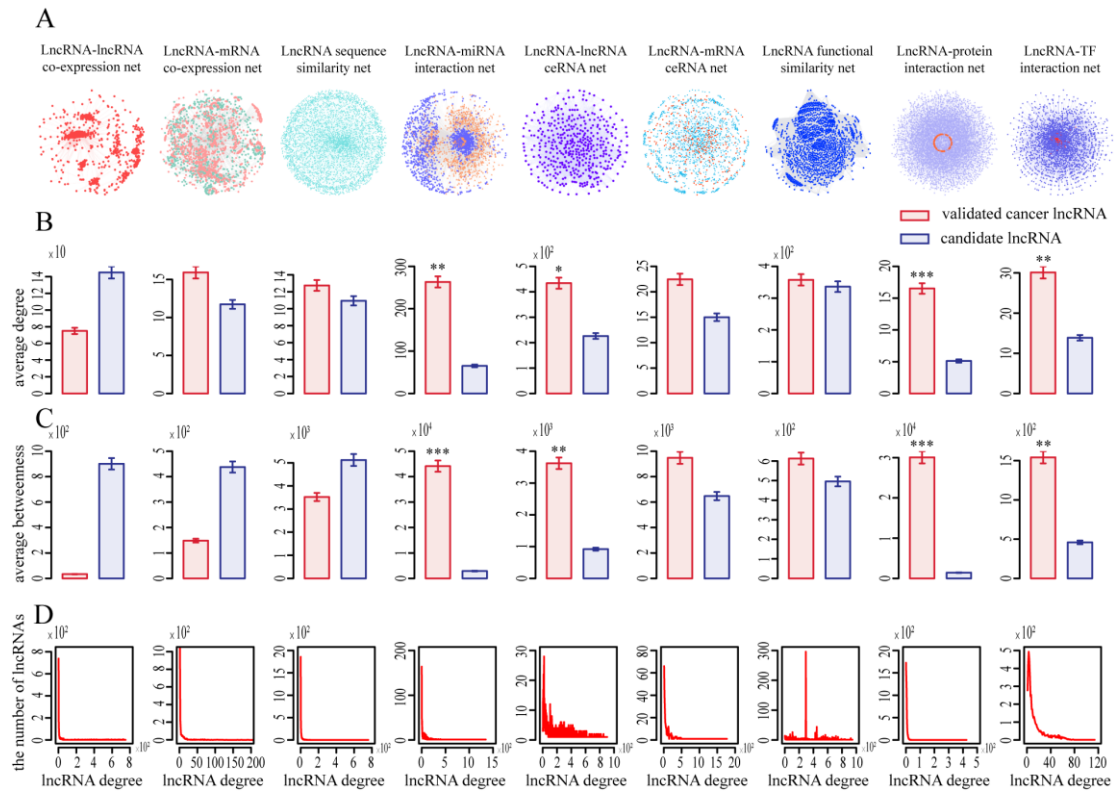

**Supplementary Figure S7**



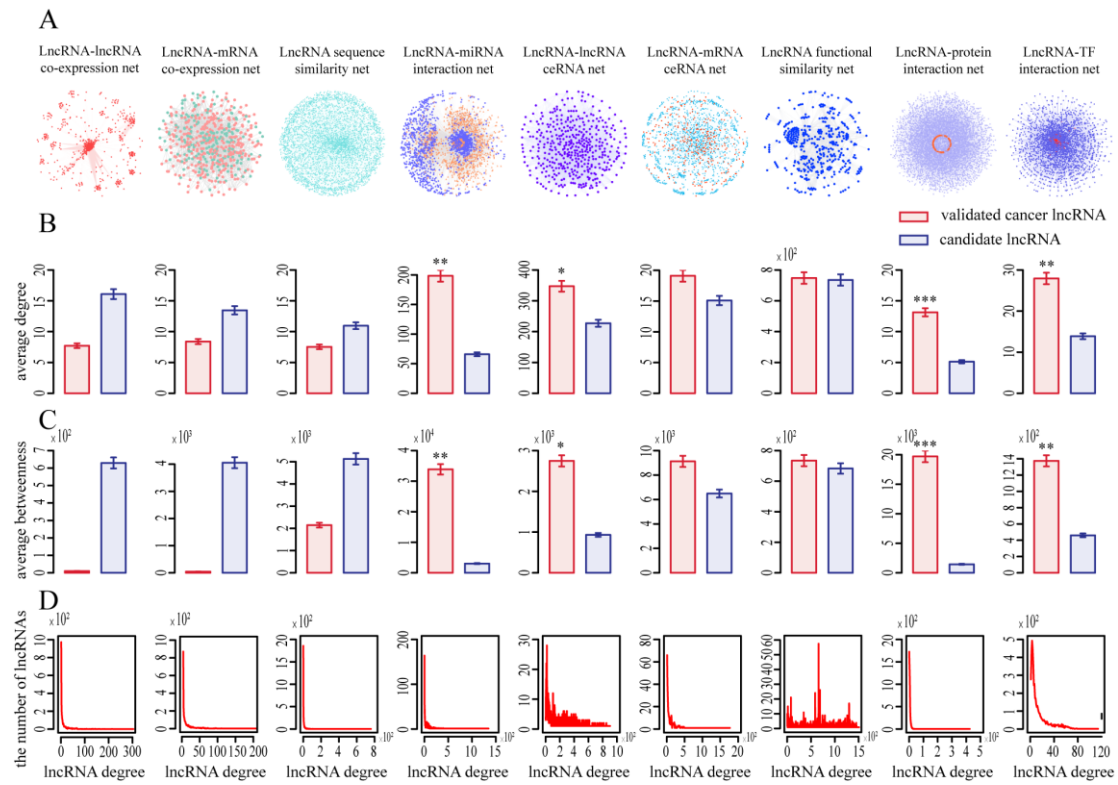

**Supplementary Figure S8**

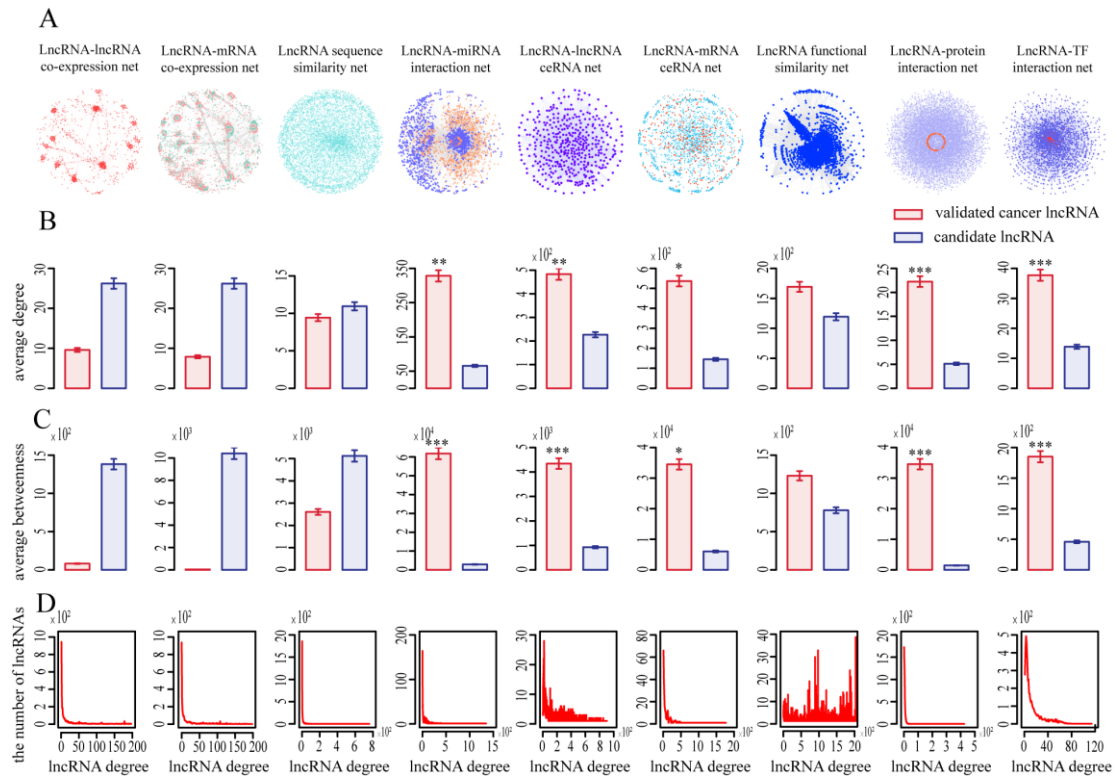

**Supplementary Figure S9**

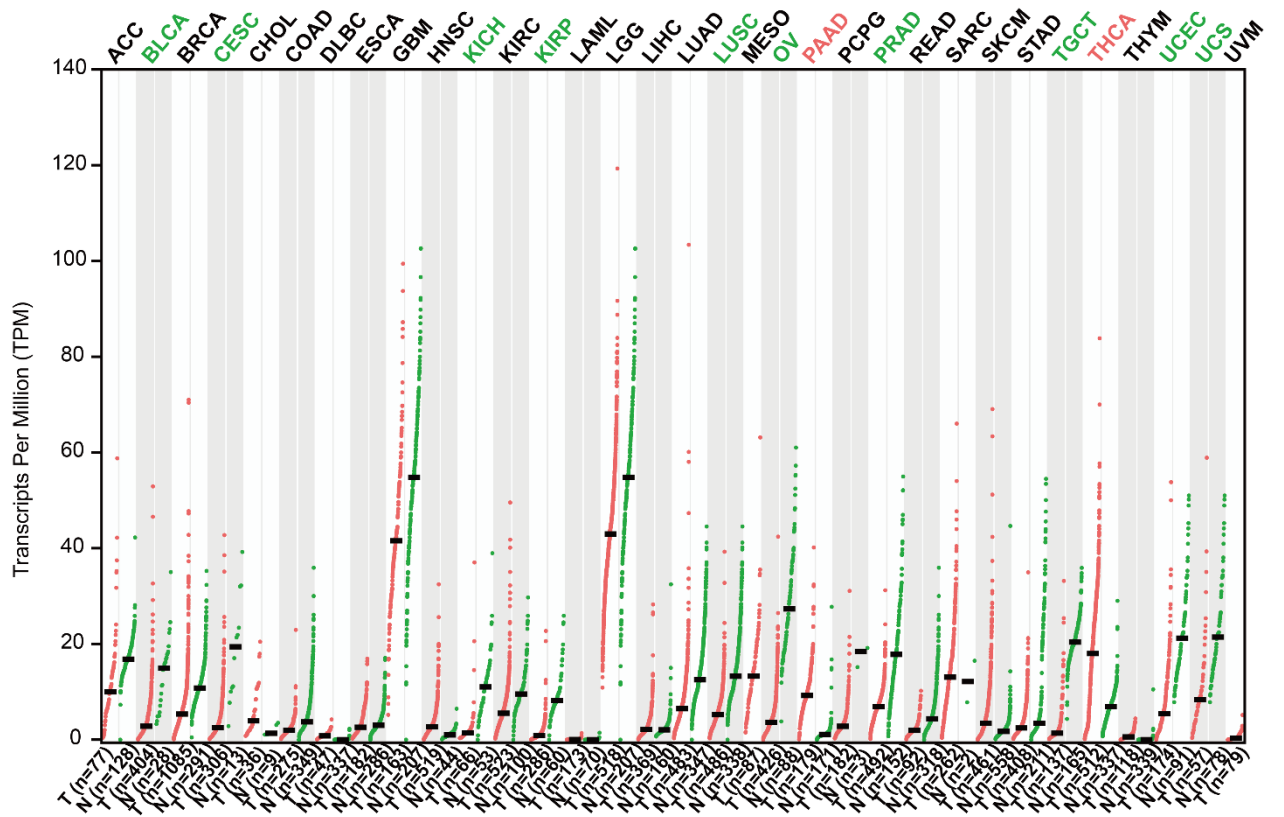

## Supplementary Tables

**Supplementary Table S1. Number of nodes (lncRNAs) and edges involved in the nine networks across 10 cancers.**

| Cancer      | LncRNA-lncRNA co-expression net |      | LncRNA-mRNA co-expression net |      | LncRNA sequence similarity net |      | LncRNA-miRNA interaction net |      | LncRNA-lncRNA ceRNA net |      | LncRNA-mRNA ceRNA net |      | LncRNA functional similarity net |      | LncRNA-protein interaction net |       | LncRNA-TF interaction net |      |
|-------------|---------------------------------|------|-------------------------------|------|--------------------------------|------|------------------------------|------|-------------------------|------|-----------------------|------|----------------------------------|------|--------------------------------|-------|---------------------------|------|
|             | edge                            | node | edge                          | node | edge                           | node | edge                         | node | edge                    | node | edge                  | node | edge                             | node | edge                           | node  | edge                      | node |
| <b>BLCA</b> | 43867                           | 3349 | 84634                         | 3237 | 28622                          | 5231 | 109542                       | 1634 | 186306                  | 1633 | 5002                  | 329  | 1584543                          | 2656 | 53266                          | 10355 | 68676                     | 4937 |
| <b>BRCA</b> | 20595                           | 2465 | 2068                          | 596  | 28622                          | 5231 | 109542                       | 1634 | 186306                  | 1633 | 5002                  | 329  | 5360                             | 486  | 53266                          | 10355 | 68676                     | 4937 |
| <b>COAD</b> | 153099                          | 839  | 104838                        | 1749 | 28622                          | 5231 | 109542                       | 1634 | 186306                  | 1633 | 5002                  | 329  | 812450                           | 1651 | 53266                          | 10355 | 68676                     | 4937 |
| <b>HNSC</b> | 22808                           | 2246 | 11465                         | 798  | 28622                          | 5231 | 109542                       | 1634 | 186306                  | 1633 | 5002                  | 329  | 33856                            | 700  | 53266                          | 10355 | 68676                     | 4937 |
| <b>LIHC</b> | 51127                           | 3888 | 106257                        | 3781 | 28622                          | 5231 | 109542                       | 1634 | 186306                  | 1633 | 5002                  | 329  | 2511269                          | 3212 | 53266                          | 10355 | 68676                     | 4937 |
| <b>LUAD</b> | 9134                            | 2436 | 5274                          | 1005 | 28622                          | 5231 | 109542                       | 1634 | 186306                  | 1633 | 5002                  | 329  | 67340                            | 866  | 53266                          | 10355 | 68676                     | 4937 |
| <b>LUSC</b> | 1311872                         | 4840 | 9879                          | 2679 | 28622                          | 5231 | 109542                       | 1634 | 186306                  | 1633 | 5002                  | 329  | 1268028                          | 2574 | 53266                          | 10355 | 68676                     | 4937 |
| <b>OV</b>   | 3937                            | 2064 | 5994                          | 1138 | 28622                          | 5231 | 109542                       | 1634 | 186306                  | 1633 | 5002                  | 329  | 97369                            | 1013 | 53266                          | 10355 | 68676                     | 4937 |
| <b>PRAD</b> | 214609                          | 2961 | 25865                         | 2200 | 28622                          | 5231 | 109542                       | 1634 | 186306                  | 1633 | 5002                  | 329  | 286361                           | 1704 | 53266                          | 10355 | 68676                     | 4937 |
| <b>STAD</b> | 23669                           | 2947 | 34633                         | 2580 | 28622                          | 5231 | 109542                       | 1634 | 186306                  | 1633 | 5002                  | 329  | 730946                           | 1989 | 53266                          | 10355 | 68676                     | 4937 |

Note:

BLCA: Bladder urothelial carcinoma, BRCA: Breast invasive carcinoma, COAD: Colon adenocarcinoma, HNSC: Head and neck squamous cell carcinoma, LIHC: Liver hepatocellular carcinoma, LUAD: Lung adenocarcinoma, LUSC: Lung squamous cell carcinoma, OV: Ovarian serous cystadenocarcinoma, PRAD: Prostate adenocarcinoma, STAD: Stomach adenocarcinoma.

**Supplementary Table S2. Summary of literature-verified lncRNAs.**

| <b>lncRNA</b> | <b>Cancer</b> | <b>Rank by CLING</b> | <b>Ref.</b> |
|---------------|---------------|----------------------|-------------|
| NEAT1         | BLCA          | 1                    | [1]         |
| JPX           | BRCA          | 4                    | [2]         |
| TUG1          | COAD          | 2                    | [3]         |
| CDKN2B-AS1    | COAD          | 7                    | [4]         |
| NEAT1         | LIHC          | 5                    | [5]         |
| NEAT1         | OV            | 2                    | [6]         |
| TUG1          | PRAD          | 4                    | [7]         |
| TUG1          | STAD          | 4                    | [8]         |
| NEAT1         | STAD          | 7                    | [9]         |
| SNHG5         | STAD          | 10                   | [10]        |

**Supplementary Table S3. Time requirements of all three data integration methods.**

| <b>Method</b>    | <b>Calculating time (s)</b> |                     |                      |
|------------------|-----------------------------|---------------------|----------------------|
|                  | <b>1000 lncRNAs</b>         | <b>5000 lncRNAs</b> | <b>10000 lncRNAs</b> |
| <b>Endeavour</b> | 10.18                       | 60.88               | 209.26               |
| <b>DRS</b>       | 2.54                        | 8.74                | 40.01                |
| <b>CLING</b>     | 2.03                        | 4.76                | 9.17                 |

**Supplementary Table S4. CLING-ranked list of the top 20 candidate LIHC-related lncRNAs**

|   | <b>Ensembl ID</b> | <b>lncRNA name</b> | <b>Rank by CLING</b> | <b>Fold Change</b> | <b>P_value of DEA</b> |
|---|-------------------|--------------------|----------------------|--------------------|-----------------------|
| * | ENSG00000228223   | HCG11              | 1                    | 1.0133             | 9.05556E-01           |
|   | ENSG00000231607   | DLEU2              | 2                    | 2.91372            | 1.62546E-15           |
|   | ENSG00000256546   | AC156455           | 3                    | 4.82235            | 2.50761E-02           |
|   | ENSG00000186019   | AC084219           | 4                    | 7.88079            | 8.27236E-05           |
| * | ENSG00000245532   | NEAT1              | 5                    | 1.87706            | 5.57064E-09           |
| * | ENSG00000203875   | SNHG5              | 6                    | 1.63019            | 2.82935E-05           |
| * | ENSG00000225470   | JPX                | 7                    | 1.53206            | 8.46220E-13           |
|   | ENSG00000245910   | SNHG6              | 8                    | 3.67549            | 1.56098E-16           |
|   | ENSG00000231074   | HCG18              | 9                    | 2.70257            | 5.02553E-27           |
| * | ENSG00000247556   | OIP5-AS1           | 10                   | 1.30156            | 1.49134E-06           |
| * | ENSG00000229807   | XIST               | 11                   | 1.89379            | 4.86458E-03           |
| * | ENSG00000245937   | CTC-228N24         | 12                   | 1.57514            | 3.31332E-13           |
| * | ENSG00000179743   | RP11-169K16        | 13                   | 1.81327            | 3.27600E-13           |
|   | ENSG00000251136   | RP11-37B2          | 14                   | 2.88419            | 4.88060E-18           |
|   | ENSG00000270141   | TERC               | 15                   | 4.07585            | 2.93156E-04           |
|   | ENSG00000197989   | SNHG12             | 16                   | 3.57383            | 9.05450E-19           |
| * | ENSG00000246430   | LINC00968          | 17                   | 1.52574            | 4.45396E-01           |
|   | ENSG00000232512   | 7SK                | 18                   | 7.20728            | 4.57999E-02           |
| * | ENSG00000186594   | MIR22HG            | 19                   | 0.94995            | 5.37193E-01           |
|   | ENSG00000225783   | MIAT               | 20                   | 3.34346            | 3.98399E-02           |

Note: \* signifies lncRNAs that could not be identified by DEA

## REFERENCES

1. XianGuo C, ZongYao H, Jun Z et al. Promoting progression and clinicopathological significance of NEAT1 over-expression in bladder cancer, *Oncotarget* 2016.
2. Huang YS, Chang CC, Lee SS et al. Xist reduction in breast cancer upregulates AKT phosphorylation via HDAC3-mediated repression of PHLPP1 expression, *Oncotarget* 2016.
3. Zhao Y, Li H, Fang S et al. NONCODE 2016: an informative and valuable data source of long non-coding RNAs, *Nucleic Acids Res* 2016;44:D203-208.
4. Naemura M, Tsunoda T, Inoue Y et al. ANRIL regulates the proliferation of human colorectal cancer cells in both two- and three-dimensional culture, *Mol Cell Biochem* 2016;412:141-146.
5. Guo S, Chen W, Luo Y et al. Clinical implication of long non-coding RNA NEAT1 expression in hepatocellular carcinoma patients, *Int J Clin Exp Pathol* 2015;8:5395-5402.
6. Chai Y, Liu J, Zhang Z et al. HuR-regulated lncRNA NEAT1 stability in tumorigenesis and progression of ovarian cancer, *Cancer Med* 2016;5:1588-1598.
7. Du Z, Sun T, Hacısuleyman E et al. Integrative analyses reveal a long noncoding RNA-mediated sponge regulatory network in prostate cancer, *Nat Commun* 2016;7:10982.
8. Zhang E, He X, Yin D et al. Increased expression of long noncoding RNA TUG1 predicts a poor prognosis of gastric cancer and regulates cell proliferation by epigenetically silencing of p57, *Cell Death Dis* 2016;7:e2109.
9. Ma Y, Liu L, Yan F et al. Enhanced expression of long non-coding RNA NEAT1 is associated with the progression of gastric adenocarcinomas, *World J Surg Oncol* 2016;14:41.
10. Zhao L, Guo H, Zhou B et al. Long non-coding RNA SNHG5 suppresses gastric cancer progression by trapping MTA2 in the cytosol, *Oncogene* 2016.
